## CORRECTION

# Region and dynamic specificities of adult neural stem cells and oligodendrocyte precursors in myelin regeneration in the mouse brain

**Béatrice Brousse, Karine Magalon, Pascale Durbec and Myriam Cayre**

There was an error published in *Biol. Open* 4, 980-992.

The statements regarding funding were incomplete and the following text has now been included in the Funding section:

This work was supported by the Fondation pour la Recherche Médicale, grant number [DEQ20140329501] to P.D.

Biology Open and the authors apologise to the readers for any confusion that this omission might have caused.
